# Supplementary material for: Measurement report: Characterization of sugars and amino acids in atmospheric fine particulates and their relationship to local primary sources
Source: Copernicus journal article supplement (doi:10.5194/acp-22-14019-2022), 2022-11-02
Supplement: Supplementary file 1 [file acp-22-14019-2022-supplement.pdf]

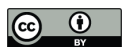

*Supplement of*

**Measurement report: Characterization of sugars  
and amino acids in atmospheric fine particulates  
and their relationship to local primary sources**

**Ren-Guo Zhu et al.**

*Correspondence to:* Hua-Yun Xiao ([xiaohuayun@sjtu.edu.cn](mailto:xiaohuayun@sjtu.edu.cn))

The copyright of individual parts of the supplement might differ from the article licence.

## **Table of Contents**

|                                                   |          |
|---------------------------------------------------|----------|
| Analysis of FAAs and CAAs concentrations          | Page S3  |
| Analytical characteristics for sugar compounds    | Page S3  |
| Analytical characteristics for water-soluble ions | Page S3  |
| Table S1                                          | Page S4  |
| Table S2                                          | Page S5  |
| Table S3                                          | Page S6  |
| Figure S1                                         | Page S7  |
| Figure S2                                         | Page S8  |
| Figure S3                                         | Page S9  |
| Figure S4                                         | Page S10 |
| Figure S5                                         | Page S11 |
| Figure S6                                         | Page S12 |
| Figure S7                                         | Page S13 |
| Figure S8                                         | Page S14 |
| Figure S9                                         | Page S15 |

### Analysis of FAAs and CAAs concentrations

FAA were extracted using a method described by our previous study (Zhu et al., 2020). Briefly, a quarter of each filter sample ( $\sim 300 \text{ m}^3$  of air) was cut and transferred into a Nalgene tube. After adding as internal reference ( $\alpha$ -aminobutyric acid), the filter was ultrasonically extracted with Milli-Q water ( $18.2 \text{ M}\Omega \text{ cm}$ ) in an ice bath. Then, the extract was ultrasonic vibration, shaken, centrifuged and filtered through a  $0.22\text{-}\mu\text{m}$  cellulose acetate membrane. The filtrate was lyophilized and resuspended in  $1 \text{ mL}$  of  $\text{HCl}$   $0.1 \text{ N}$  (v/v). Later, the samples were purified by the cation exchange column (Dowex 50W X  $8\text{H}^+$ , 200–400 mesh; Sigma-Aldrich, St Louis, MO, USA). Enriched FAAs were eluted and collected.

A hydrolysis method was used to convert all of the total hydrolysis water soluble amino acids to FAAs. The concentrations of CAAs were calculated by subtracting the amounts of FAAs from the total hydrolysis water soluble amino acids (Zhu et al., 2020). In brief, one-sixteenth of each filter sample ( $\sim 80 \text{ m}^3$  of air) was ultrasonically extracted twice for 30 min with Milli-Q water ( $18.2 \text{ M}\Omega \text{ cm}$ ).  $\alpha$ -aminobutyric acid was added to act as an internal reference. After shaken and filtered, the extract was transferred to a glass hydrolysis tube and lyophilized. Subsequently,  $10 \text{ mL}$   $6 \text{ M}$   $\text{HCl}$  was added. Glass hydrolysis tube was flushed with  $\text{N}_2$  for 3 min both below and above the liquid level and  $25 \mu\text{L}$  ascorbic acid ( $20 \mu\text{g } \mu\text{L}^{-1}$ ) was added to each extract to avoid oxidation of amino acids. The sample was hydrolyzed for 24 hr at  $110^\circ \text{C}$ . After hydrolyzed and cooling at room temperature, the samples were redissolved in Milli-Q water and purified following the same procedure for FAAs. Each purified FAA and CAA was lyophilized to complete dryness.  $150 \mu\text{g}$  anhydrous  $\text{Na}_2\text{SO}_4$ ,  $50 \mu\text{L}$  pyridine, and  $50 \mu\text{L}$   $\text{N}$ -methyl- $\text{N}$ -(tert-butyldimethylsilyl) trifluoroacetamide were added in that order. Finally, the sample was heated at  $70^\circ \text{C}$  for 1 hr to achieve the chemical derivatization of amino acids and then the derivatives were analyzed by gas chromatograph-mass spectrometer (Thermo Scientific, Bremen, Germany).

Detail quality assurance and control (recoveries, linearity, detection limits, quantitation limits, and corresponding effective limits in the aerosol samples of AAs, are available in our previous study (Zhu et al., 2020).

### Analytical characteristics for sugar compounds

In total sixteen sugar compounds, including three anhydrosugars (levoglucosan, galactosan, mannosan), nine primary sugars (sucrose, glucose, fructose, ribose, trehalose, galactose, turanose, lactulose and maltose), and four sugar alcohols (arabitol, mannitol, pinitol and inositol), were detected in the Nanchang aerosols. The detailed method validation was provided in Table S2. Recoveries for sugars were better than 89% as obtained for the standards spiked onto the precombusted blank filters and treated as a real sample. The reproducibility of the analytical procedure was assessed through the relative standard deviation (RSD) of the replicate measurements. The RSD values ranged from 1.7 to 11.6%. The detection limits of sugars correspond to ambient concentrations of  $0.2\text{--}0.9 \text{ ng } \mu\text{L}^{-1}$ , which corresponds to ambient concentrations of  $0.2\text{--}1.1 \text{ ng m}^{-3}$  under a typical sampling volume of  $1320 \text{ m}^3$ .

### Analytical characteristics for water-soluble ions

Standard solutions of water-soluble ions ( $\text{Na}^+$ ,  $\text{NH}_4^+$ ,  $\text{K}^+$ ,  $\text{Mg}^{2+}$ ,  $\text{Ca}^{2+}$ ,  $\text{Cl}^-$ ,  $\text{NO}_3^-$  and  $\text{SO}_4^{2-}$ ) were used for making the external standard curve before the analysis of  $\text{PM}_{2.5}$  samples. The correlation coefficients of the calibration curves were greater than 0.999. The detection limit of  $\text{Na}^+$ ,  $\text{NH}_4^+$ ,  $\text{K}^+$ ,  $\text{Mg}^{2+}$ ,  $\text{Ca}^{2+}$ ,  $\text{Cl}^-$ ,  $\text{NO}_3^-$  and  $\text{SO}_4^{2-}$  were  $0.001 \mu\text{g L}^{-1}$ ,  $1.21 \mu\text{g L}^{-1}$ ,  $1.77 \mu\text{g L}^{-1}$ ,  $2.47 \mu\text{g L}^{-1}$ ,  $0.09 \mu\text{g L}^{-1}$ ,  $5.1 \mu\text{g L}^{-1}$ ,  $21.6 \mu\text{g L}^{-1}$  and  $11.5 \mu\text{g L}^{-1}$ , respectively. The relative standard deviation of the reproducibility test was less than 5%.

Table S1. The Characteristics of sampling sites.

| <b>Sampling sites</b> | <b>characteristics</b>                                                                                                                                                                         |
|-----------------------|------------------------------------------------------------------------------------------------------------------------------------------------------------------------------------------------|
| <b>Urban</b>          | an area characterized by high traffic volumes (1,042 vehicles h <sup>-1</sup> ), high population density (8,399 people km <sup>-2</sup> ) and low vegetation coverage (29%).                   |
| <b>Rural</b>          | open area influenced by agricultural activities                                                                                                                                                |
| <b>Forest</b>         | ~20 km from the city center, characterized by low traffic volumes (24 vehicles h <sup>-1</sup> ), low population density (315 people km <sup>-2</sup> ), and high vegetation coverage (71.2%). |

Table S2. Calibration curves parameters, limits of detection (LOD), relative standard deviation (RSD), recoveries and of the sugar standards.

| Compounds           | Compound class     | Concentration range<br>(ng $\mu\text{L}^{-1}$ ) | Slope  | Intercept | $r^2$ | LOD(ng $\mu\text{L}^{-1}$ ) | LOD(ng $\text{m}^{-3}$ ) | RSD(%) | Recovery(%)      |
|---------------------|--------------------|-------------------------------------------------|--------|-----------|-------|-----------------------------|--------------------------|--------|------------------|
| <b>Levoglucosan</b> | Anhydrosaccharides | 1.6-162.1                                       | 0.0156 | -0.0252   | 0.999 | 0.8                         | 1.0                      | 3.2    | 106.5 $\pm$ 3.4  |
| <b>Mannosan</b>     | Anhydrosaccharides | 1.6-81.1                                        | 0.0193 | -0.0114   | 0.993 | 0.6                         | 0.7                      | 8.8    | 102.6 $\pm$ 9.1  |
| <b>Galactosan</b>   | Anhydrosaccharides | 1.6-81.1                                        | 0.0392 | -0.0351   | 0.992 | 0.8                         | 1.0                      | 3.5    | 89.4 $\pm$ 3.1   |
| <b>Galactose</b>    | Monosaccharides    | 1.8-180.2                                       | 0.0320 | -0.0195   | 0.995 | 0.9                         | 1.1                      | 3.1    | 107.9 $\pm$ 3.3  |
| <b>Ribose</b>       | Monosaccharides    | 1.5-150.1                                       | 0.0340 | -0.0278   | 0.991 | 0.4                         | 0.5                      | 6.0    | 90.4 $\pm$ 5.4   |
| <b>Fructose</b>     | Monosaccharides    | 1.8-180.2                                       | 0.0178 | -0.0246   | 0.991 | 0.5                         | 0.6                      | 5.3    | 104.2 $\pm$ 5.5  |
| <b>Glucose</b>      | Monosaccharides    | 9-180.2                                         | 0.0126 | -0.0654   | 0.975 | 0.9                         | 1.1                      | 7.0    | 107.7 $\pm$ 7.6  |
| <b>Sucrose</b>      | Disaccharides      | 3.4-342.3                                       | 0.0286 | -0.0261   | 0.990 | 0.7                         | 0.8                      | 1.7    | 104.4 $\pm$ 1.8  |
| <b>Maltose</b>      | Disaccharides      | 3.6-180.2                                       | 0.0129 | -0.0173   | 0.994 | 0.8                         | 1.0                      | 5.5    | 97.9 $\pm$ 5.4   |
| <b>Turanose</b>     | Disaccharides      | 3.4-171.2                                       | 0.0194 | -0.0381   | 0.993 | 0.9                         | 1.1                      | 3.2    | 95.0 $\pm$ 3.0   |
| <b>Lactulose</b>    | Disaccharides      | 3.4-171.2                                       | 0.0208 | -0.0243   | 0.993 | 0.8                         | 1.0                      | 4.4    | 108.0 $\pm$ 4.8  |
| <b>Trehalose</b>    | Disaccharides      | 3.8-189.2                                       | 0.0271 | -0.0195   | 0.991 | 0.6                         | 0.7                      | 2.7    | 91.4 $\pm$ 2.5   |
| <b>Arabitol</b>     | Sugar alcohols     | 1.5-152.2                                       | 0.0268 | -0.0392   | 0.999 | 0.4                         | 0.5                      | 10.8   | 91.8 $\pm$ 9.0   |
| <b>Mannitol</b>     | Sugar alcohols     | 36.4-182.2                                      | 0.0052 | -0.1391   | 0.996 | 0.2                         | 0.2                      | 8.4    | 93.5 $\pm$ 7.9   |
| <b>Pinitol</b>      | Sugar alcohols     | 1.9-194.2                                       | 0.0262 | -0.0213   | 0.992 | 0.4                         | 0.5                      | 10.2   | 94.8 $\pm$ 9.6   |
| <b>inositol</b>     | Sugar alcohols     | 1.8-90.1                                        | 0.0278 | -0.0124   | 0.995 | 0.6                         | 0.7                      | 11.6   | 108.8 $\pm$ 12.6 |

Table S3. Statistical summary of correlations between levoglucosan and Nss-K<sup>+</sup> in aerosol samples.

| Sampling sites                          | Linear regression                   | Correlation coefficient | p value | Significance of correlation at p value < 0.05 | Reference                 |
|-----------------------------------------|-------------------------------------|-------------------------|---------|-----------------------------------------------|---------------------------|
| Urban, Nanchang, China                  | Lev = 0.07 K <sup>+</sup> +37.7     | r=0.6                   | <0.05   | Significant                                   | this study                |
| Rural, Nanchang, China                  |                                     | r=0.3                   | >0.05   | Not significant                               | this study                |
| Forest, Nanchang, China                 |                                     | r=-0.2                  | >0.05   | Not significant                               | this study                |
| rural region of São Paulo State, Brazil | Lev = 0.086 K <sup>+</sup> +0.032   | r=0.62                  | <0.01   | Significant                                   | Urban et al., 2012        |
| Kunmin, China                           | Lev = 107.72 K <sup>+</sup> +209.91 | r=0.33                  | <0.05   | Significant                                   | Wang et al., 2021         |
| Beijing, China, Summer                  | Lev = 0.05 K <sup>+</sup> +0.07     | R <sup>2</sup> =0.34    | <0.05   | Significant                                   | Cheng et al., 2013        |
| Beijing, China, Winter                  | Lev = 0.50 K <sup>+</sup> +0.03     | R <sup>2</sup> =0.82    | <0.05   | Significant                                   | Cheng et al., 2013        |
| Western North Pacific Rim               |                                     | r=0.38                  | <0.01   | Significant                                   | Kawamura and Kunwar, 2015 |

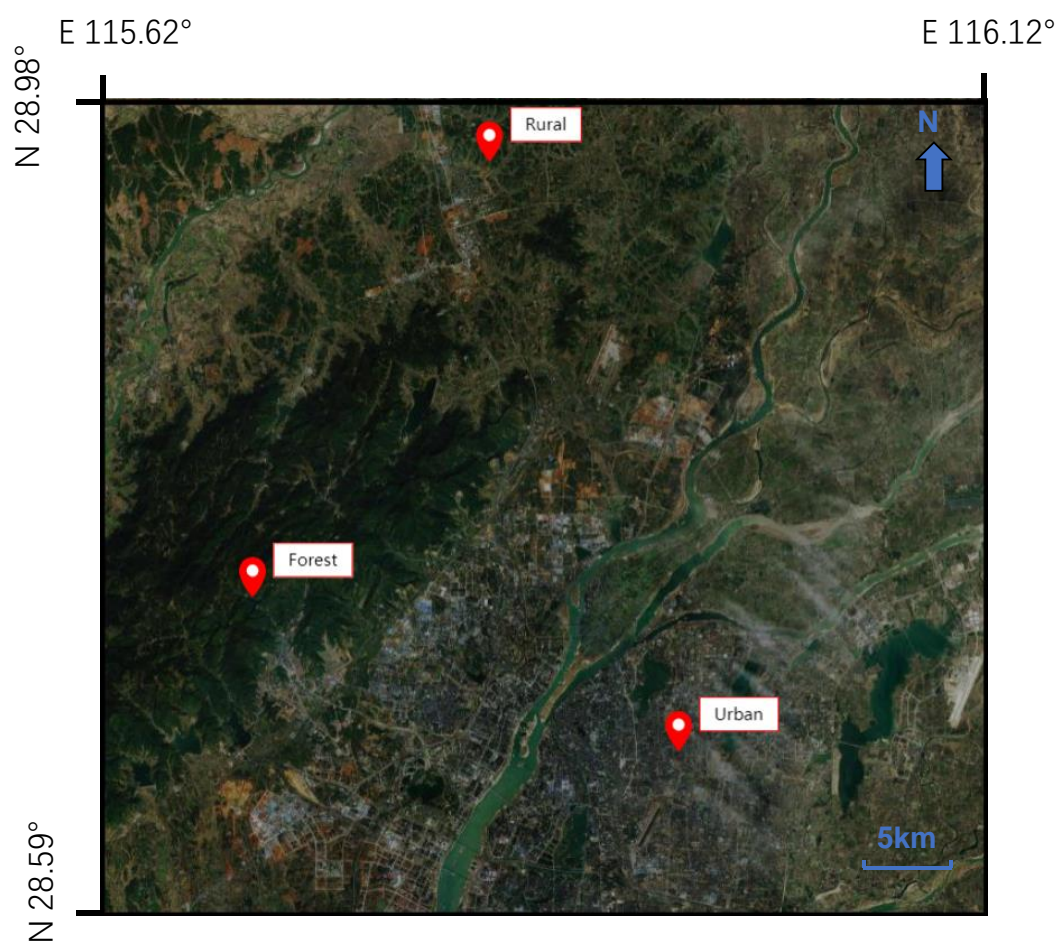

Figure S1. Map showing the locations of the sampling stations. The locational map was modified from MAPWORLD (<https://map.tianditu.gov.cn/>).

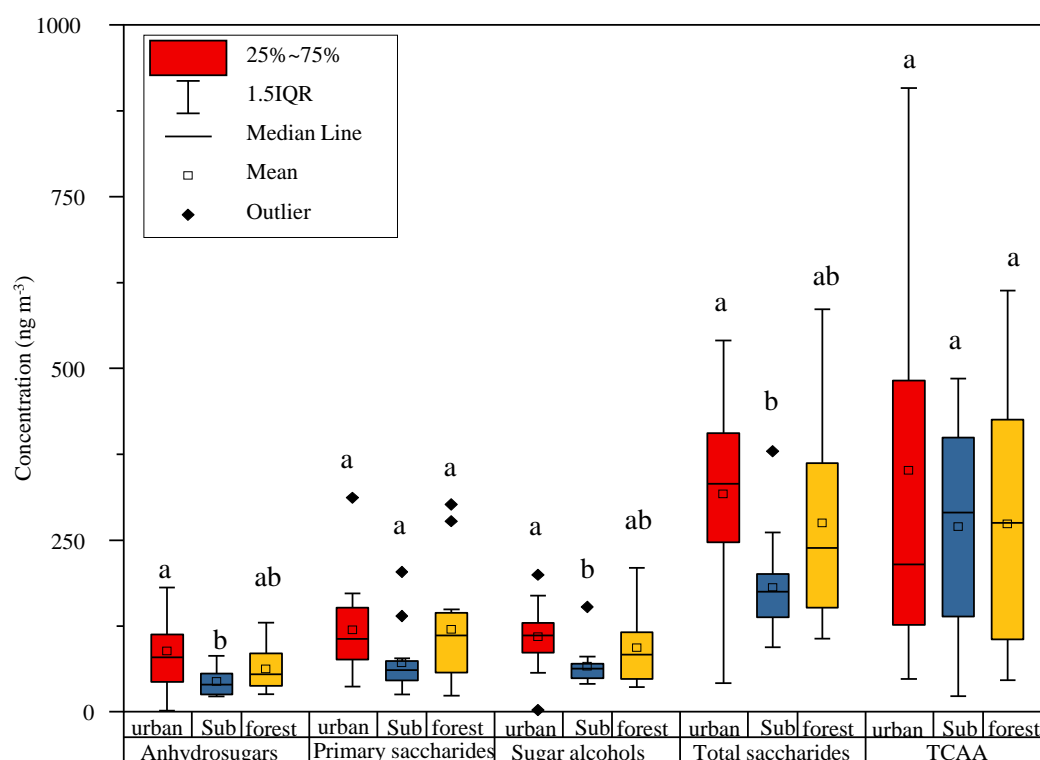

Figure S2. Concentrations of anhydrosugars, primary saccharides, sugar alcohols, total saccharides and TCAA in PM<sub>2.5</sub> sampled from urban, rural and forest sites. The box encloses 50% of the data, the whisker is 1.5 interquartile range of the data, the horizontal bar is the median, hollow square is mean and solid diamond are outliers. Different lower case letters denote means found to be statistically different between sites (one-way ANOVA,  $p < 0.05$ ).

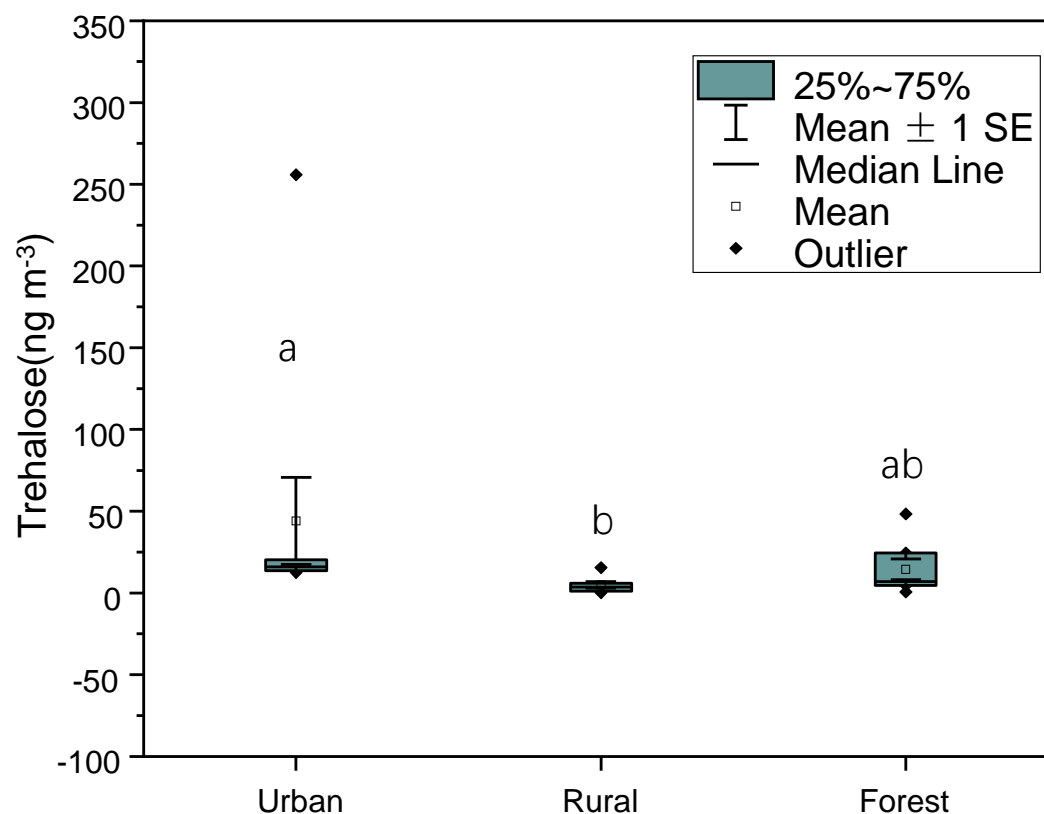

Figure S3. Concentrations of trehalose in PM<sub>2.5</sub> sampled from urban, rural and forest sites. The box encloses 50% of the data, the whisker is standard error of the data, the horizontal bar is the median, hollow square is mean and solid diamond are outliers. Different lower case letters denote means found to be statistically different between sites (one-way ANOVA,  $p < 0.05$ ).

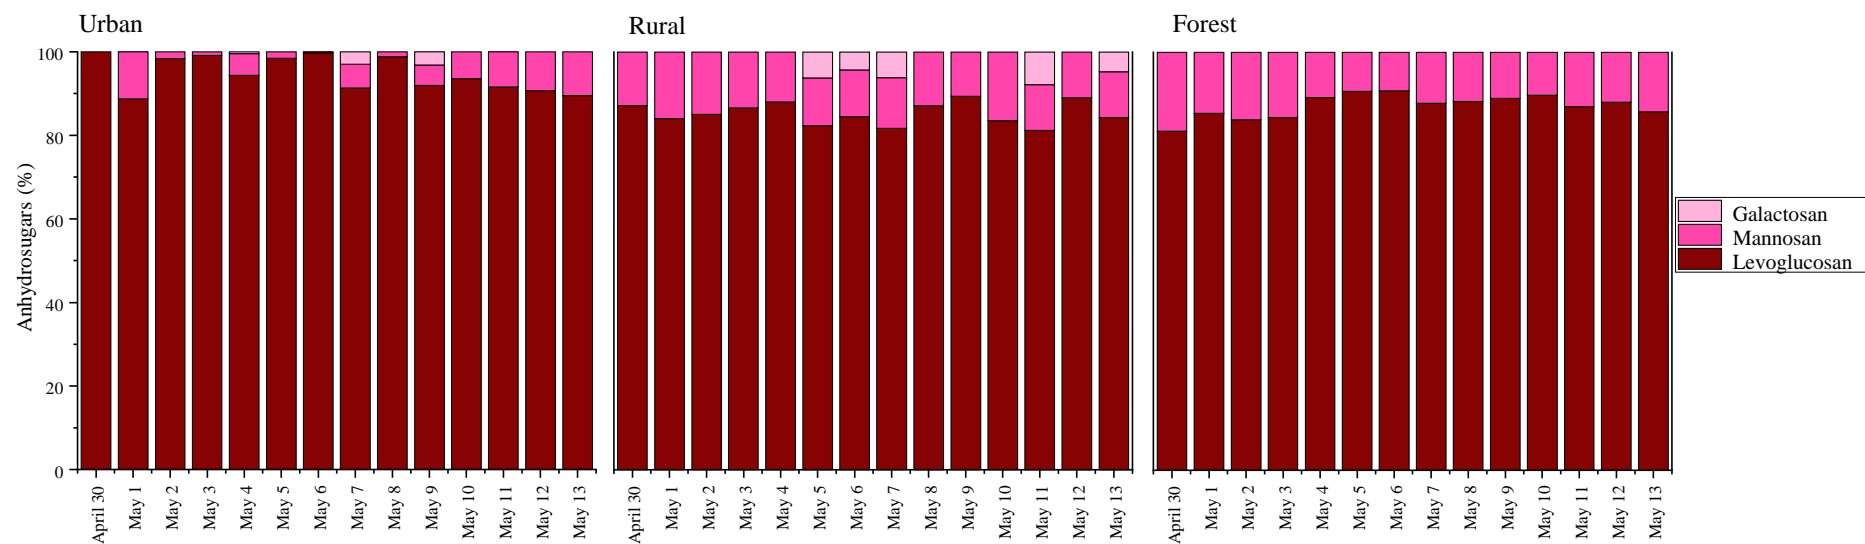

Figure S4. The percent distributions of each individual anhydrosugars (% of total anhydrosugars) in PM<sub>2.5</sub> sampled in urban, rural and forest sites.

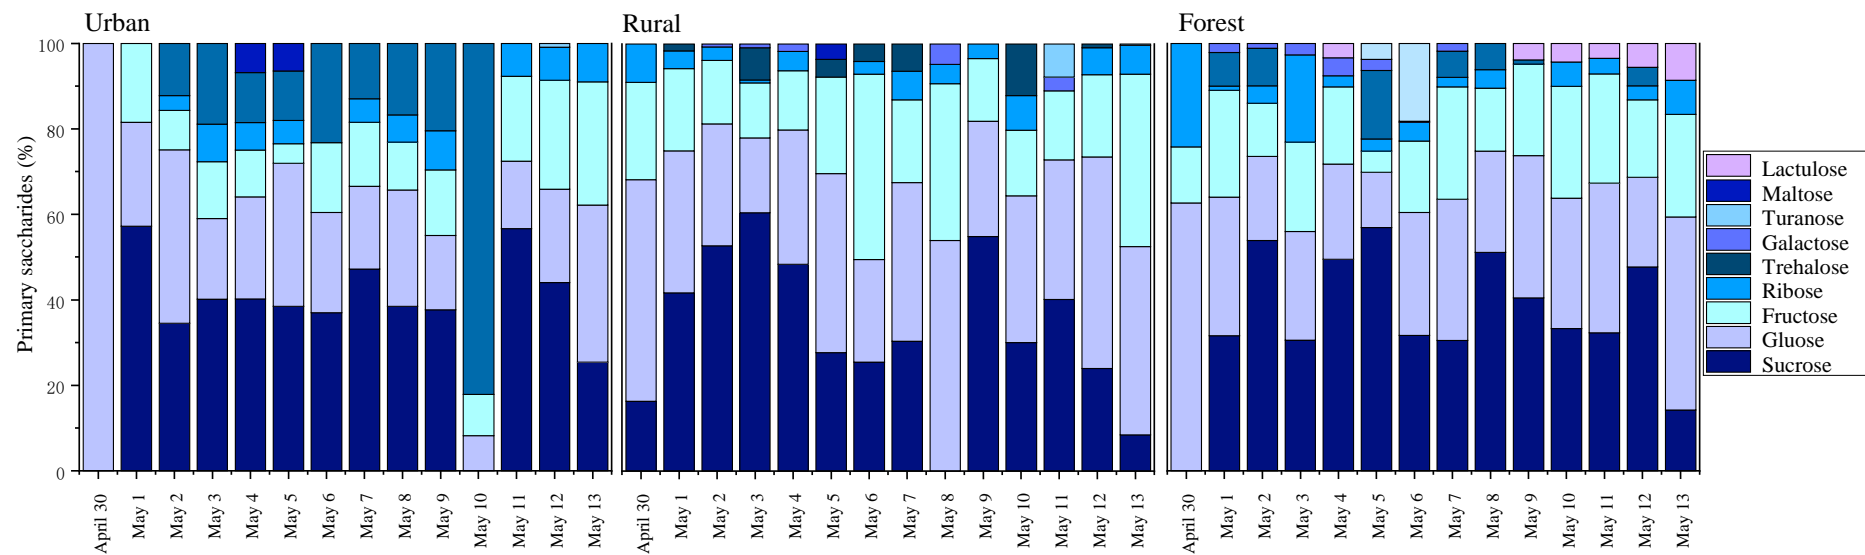

Figure S5. The percent distributions of each individual primary saccharides (% of total primary saccharides) in PM2.5 sampled in urban, rural and forest sites.

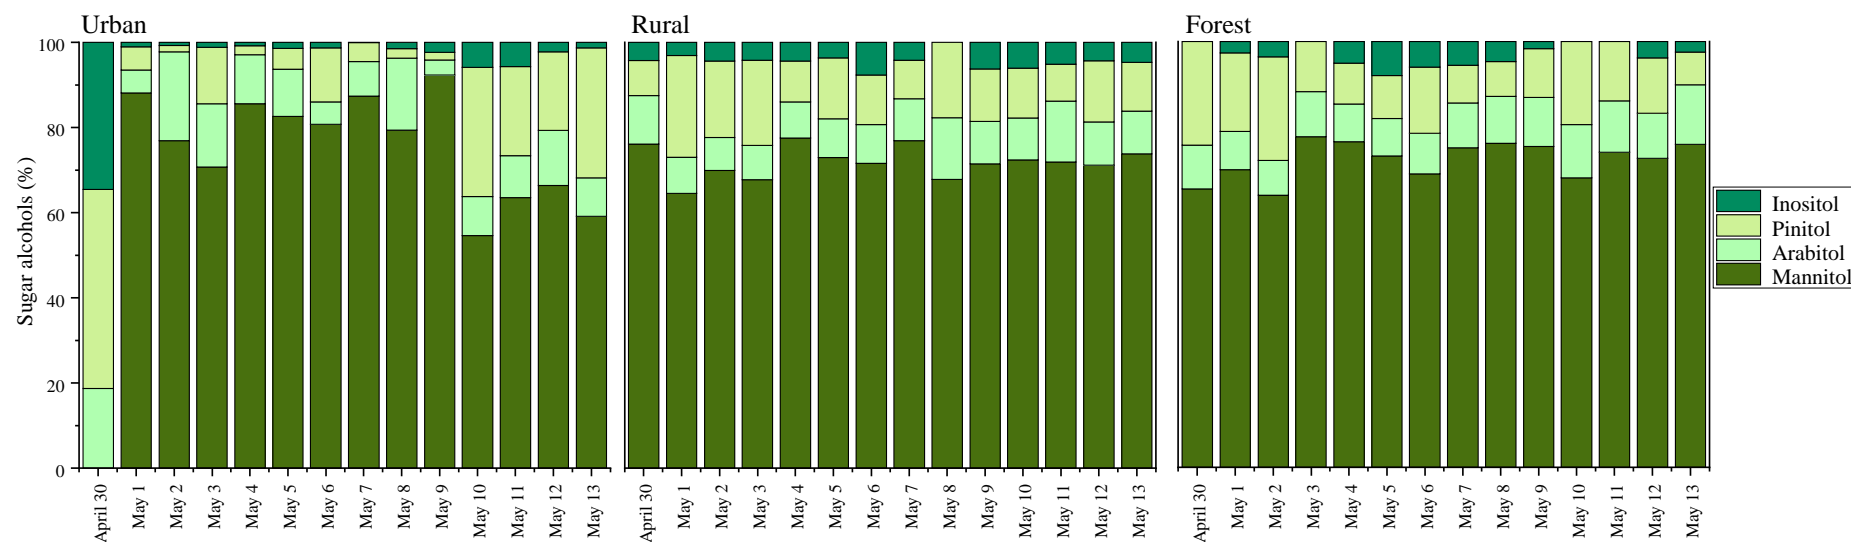

Figure S6. The percent distributions of each individual sugar alcohols (% of total sugar alcohols) in PM<sub>2.5</sub> sampled in urban, rural and forest sites.

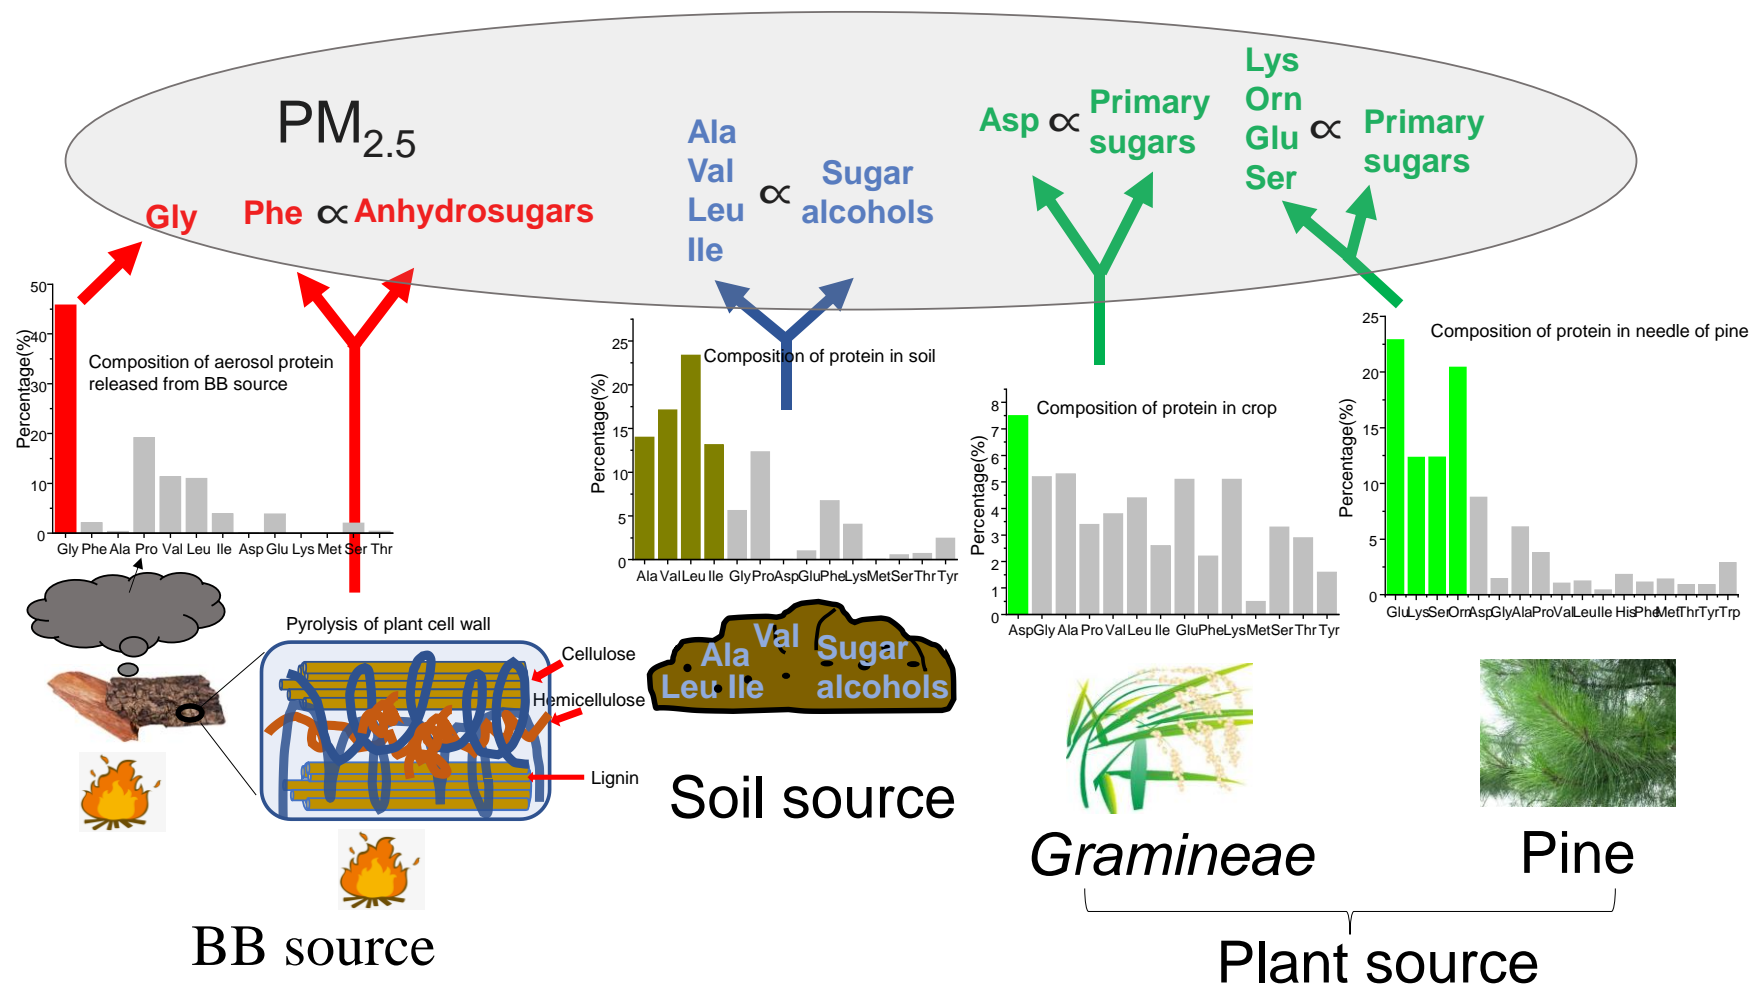

Figure S7. Grouping principles for CAAs.

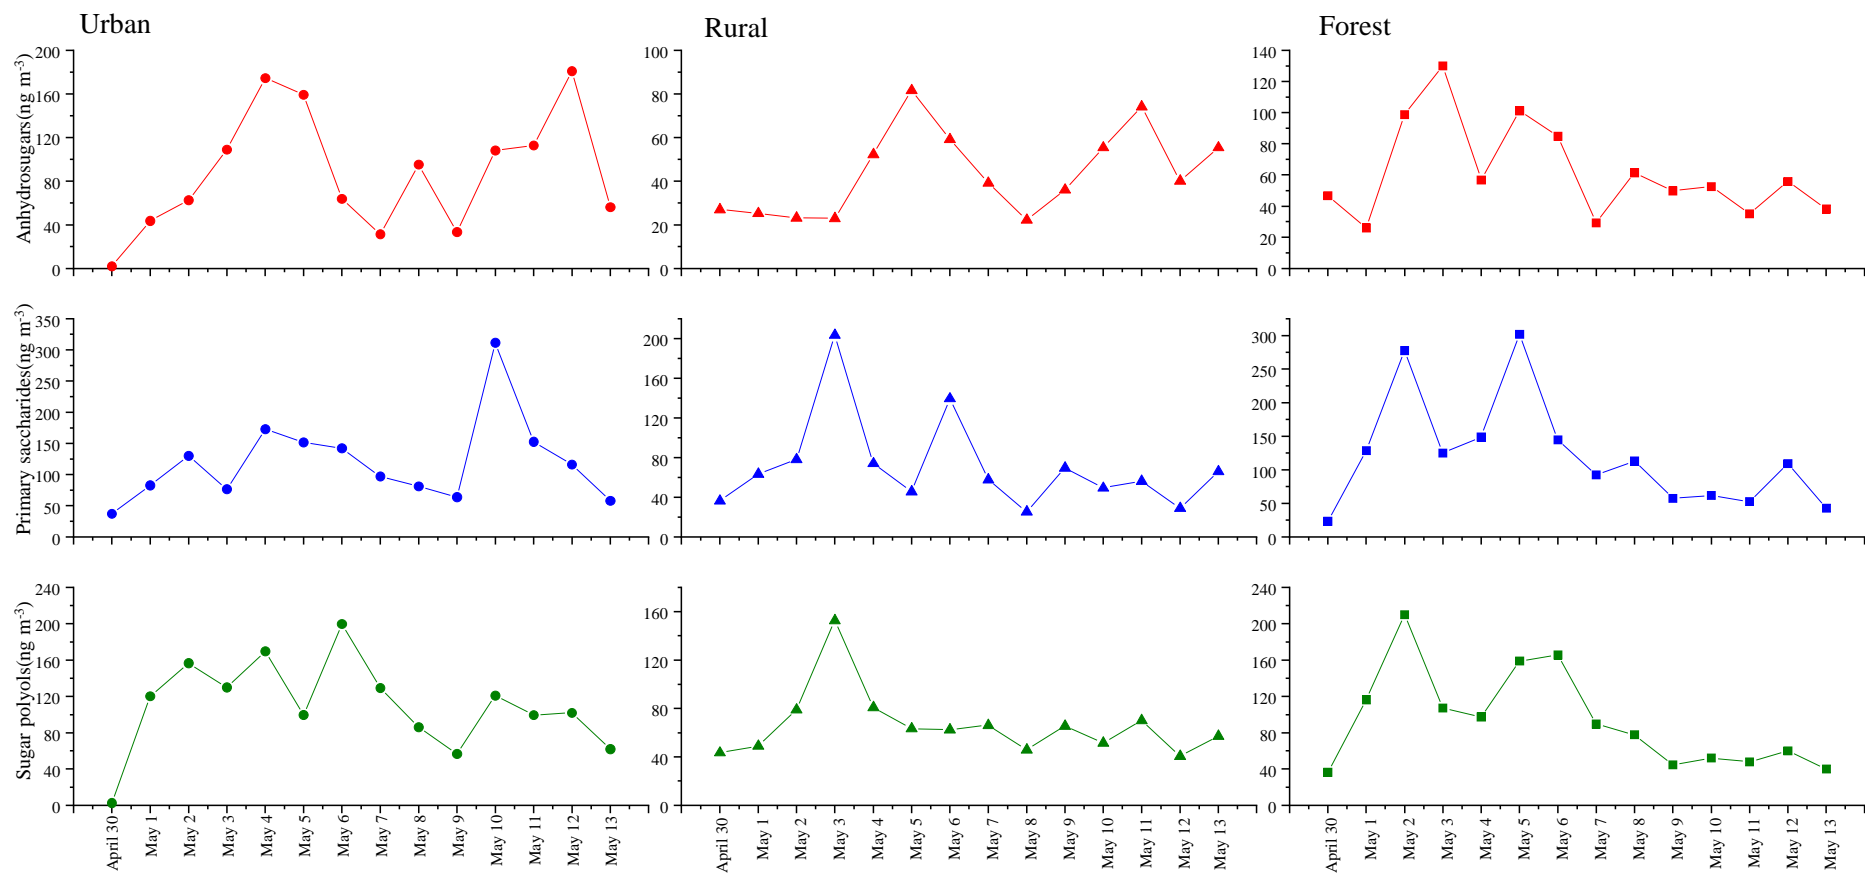

Figure S8. Temporal variations in the concentrations of anhydrosugars, primary saccharides and sugar alcohols detected in PM<sub>2.5</sub> at urban, rural and forest sites.

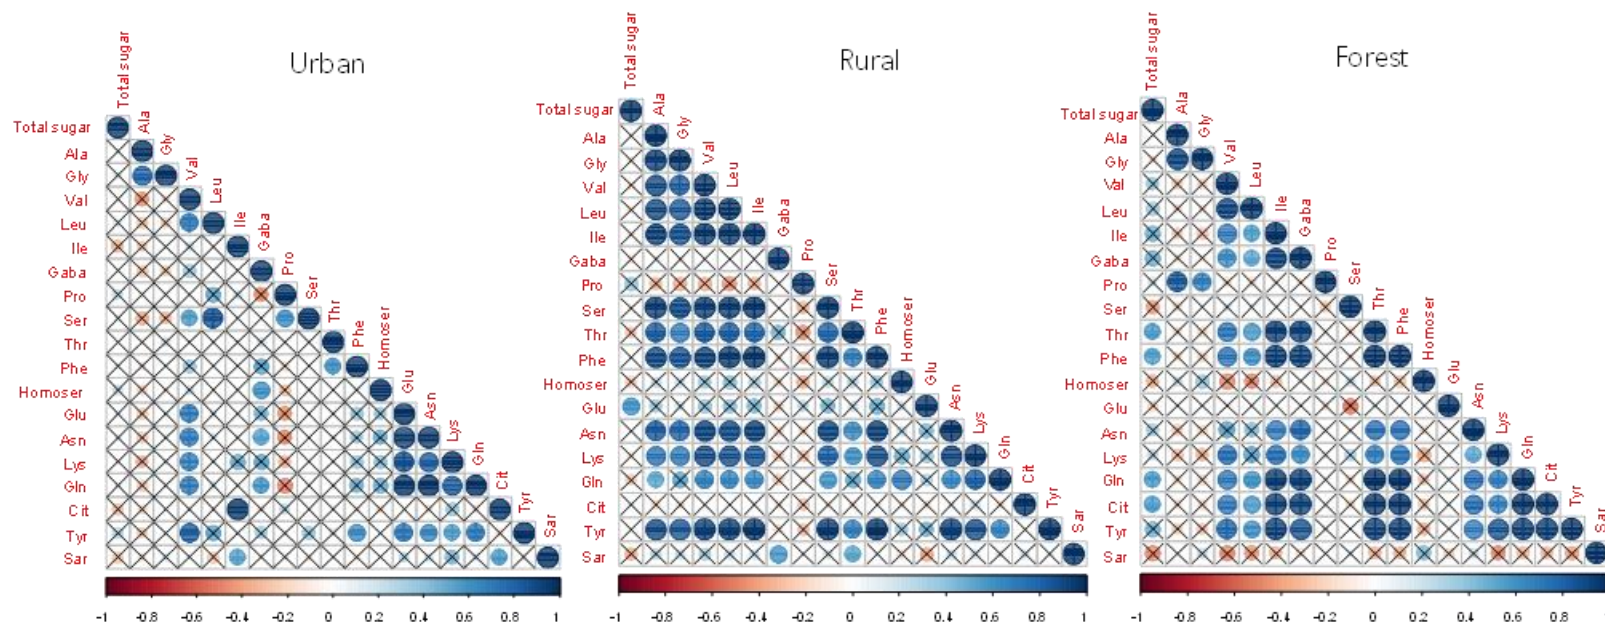

Figure S9. Pearson correlations between  $\Sigma$ sugar concentrations and individual FAA species in PM<sub>2.5</sub> collected in urban, rural and forest sites. The cross indicates a  $p$ -value higher than 0.05. The ball indicates a  $p$ -value less than 0.05. The larger a ball is, the more significant the correlation is
